# Supplementary material for: MM-PBSA free energy analysis of endo-1,4-xylanase II (XynII)–substrate complexes: binding of the reactive sugar in a skew boat and chair conformation
Source: Royal Society of Chemistry journal article supplement (doi:10.1039/b307335a), 2003-01-01
Supplement: b307335a.doc [file b307335a.doc]

**Supplementary** **data**

# MM–PBSA free energy analysis of endo–1,4–xylanase II (XynII)–substrate complexes: binding of the reactive sugar in a skew–boat and chair conformation

Tuomo Laitinen,1 Juha Rouvinen2 and Mikael Peräkylä*1

*1) Department of Chemistry, University of Kuopio, PO Box 1627, FIN-70211 Kuopio, Finland*

*2) Department of Chemistry, University of Joensuu, PO Box 111, FIN-80101 Joensuu, Finland*

CY is the new type of C1 carbon in the intermediate system

bond parameters

CY-OS 570.0 1.230

CY-CT 317.0 1.496

CY-H2 367.0 1.079a

angle parameters

CY-OS-CT 100.0 124.7

CY-OS-HO 60.0 119.5

CY-CT-HC 50.0 109.50

CT-CY-OS 80.0 124.3

H2-CY-OS 50.0 115.80

H2-CY-CT 50.0 119.80

CY-CT-CT 63.0 111.10

CY-CT-H1 50.0 104.7

CY-CT-OH 50.0 105.6

dihedral parameters

X -CY-CT-X 4 0.00 0.0 2.

CT-CY-OS-C 1 0.70 0.0 1.

CT-CT-CY-OS 1 0.15 0.0 -1.

CT-CT-CY-OS 1 0.30 180.0 -2.

CT-CT-CY-OS 1 0.10 0.0 3.

CY-CT-CT-CT 1 0.2 0.0 -2.

CY-CT-CT-CT 1 0.30 180.0 1.

H2-CY-OS-CT 1 0.70 0.0 1.

CT-CY-OS-CT 1 0.70 0.0 1.

improper torsion parametrs

X -X -CY-OS 10.5 180. 2.

xylotetraose

X Y Z RESP-charge

ATOM 1 C1 XB 1 4.877 7.737 20.379 0.2487

ATOM 2 H1 XB 1 4.438 6.856 20.847 0.0749

ATOM 3 C2 XB 1 4.514 9.022 21.182 0.0296

ATOM 4 H2 XB 1 4.954 9.888 20.689 0.1250

ATOM 5 O2 XB 1 4.926 8.888 22.527 -0.6299

ATOM 6 H2O XB 1 5.856 9.108 22.620 0.4236

ATOM 7 C3 XB 1 3.016 9.144 21.088 0.0799

ATOM 8 H3 XB 1 2.591 8.346 21.697 0.1146

ATOM 9 O3 XB 1 2.550 10.301 21.780 -0.6796

ATOM 10 H3O XB 1 3.065 10.467 22.573 0.4638

ATOM 11 C4 XB 1 2.461 9.211 19.664 0.2154

ATOM 12 H4 XB 1 2.692 10.161 19.182 0.0966

ATOM 13 O4 XB 1 1.056 9.196 19.729 -0.6852

ATOM 14 H4O XB 1 0.826 9.911 20.328 0.4513

ATOM 15 C5 XB 1 3.008 8.007 18.961 -0.0259

ATOM 16 H51 XB 1 2.526 7.170 19.466 0.1123

ATOM 17 OR XB 1 4.430 7.861 19.005 -0.3775

ATOM 18 H52 XB 1 2.758 8.112 17.905 0.1123

ATOM 19 C1 XP 2 8.850 4.773 21.712 0.2838

ATOM 20 H1 XP 2 9.288 5.039 20.750 0.0612

ATOM 21 C2 XP 2 7.510 4.095 21.441 0.0006

ATOM 22 H2 XP 2 7.034 3.885 22.398 0.1033

ATOM 23 O2 XP 2 7.782 2.915 20.662 -0.6415

ATOM 24 H2O XP 2 8.517 2.471 21.090 0.4407

ATOM 25 C3 XP 2 6.669 5.069 20.672 0.1335

ATOM 26 H3 XP 2 7.179 5.137 19.711 0.0979

ATOM 27 O3 XP 2 5.314 4.489 20.482 -0.6450

ATOM 28 H3O XP 2 4.870 4.533 21.332 0.4556

ATOM 29 C4 XP 2 6.700 6.529 21.273 0.2222

ATOM 30 H4 XP 2 6.119 6.575 22.194 0.0849

ATOM 31 O4 XP 2 6.250 7.491 20.315 -0.3768

ATOM 32 C5 XP 2 8.120 6.987 21.623 -0.0764

ATOM 33 H51 XP 2 8.705 7.088 20.708 0.0903

ATOM 34 OR XP 2 8.559 5.945 22.506 -0.3237

ATOM 35 H52 XP 2 8.073 7.976 22.079 0.0903

ATOM 36 C1 XP 3 13.731 3.712 23.312 0.2838

ATOM 37 H1 XP 3 13.662 2.645 23.103 0.0612

ATOM 38 C2 XP 3 12.884 4.211 24.505 0.0006

ATOM 39 H2 XP 3 13.011 5.290 24.597 0.1033

ATOM 40 O2 XP 3 13.202 3.492 25.701 -0.6415

ATOM 41 H2O XP 3 14.084 3.807 25.913 0.4407

ATOM 42 C3 XP 3 11.340 4.087 24.250 0.1335

ATOM 43 H3 XP 3 11.075 3.030 24.216 0.0979

ATOM 44 O3 XP 3 10.553 4.734 25.297 -0.6458

ATOM 45 H3O XP 3 10.600 4.296 26.149 0.4556

ATOM 46 C4 XP 3 11.017 4.543 22.805 0.2222

ATOM 47 H4 XP 3 10.982 5.632 22.770 0.0849

ATOM 48 O4 XP 3 9.683 4.002 22.505 -0.3768

ATOM 49 C5 XP 3 11.992 4.012 21.838 -0.0764

ATOM 50 H51 XP 3 11.800 2.939 21.849 0.0903

ATOM 51 OR XP 3 13.324 4.412 22.159 -0.3238

ATOM 52 H52 XP 3 11.751 4.360 20.834 0.0903

ATOM 53 C1 XT 4 18.556 2.278 22.542 0.3602

ATOM 54 H1 XT 4 18.988 1.936 23.482 0.0377

ATOM 55 C2 XT 4 18.623 3.819 22.512 0.0811

ATOM 56 H2 XT 4 18.520 4.177 21.487 0.0981

ATOM 57 O2 XT 4 19.814 4.325 23.027 -0.6980

ATOM 58 H2O XT 4 19.730 5.276 23.136 0.4751

ATOM 59 C3 XT 4 17.448 4.429 23.262 0.1665

ATOM 60 H3 XT 4 17.532 4.267 24.337 0.0747

ATOM 61 O3 XT 4 17.294 5.812 23.025 -0.6688

ATOM 62 H3O XT 4 17.130 6.178 23.897 0.4586

ATOM 63 C4 XT 4 16.115 3.673 22.748 0.3143

ATOM 64 H4 XT 4 15.968 3.988 21.715 0.0450

ATOM 65 O4 XT 4 15.070 4.138 23.567 -0.3975

ATOM 66 C5 XT 4 16.249 2.203 22.958 0.0016

ATOM 67 H51 XT 4 16.350 1.948 24.013 0.0689

ATOM 68 OR XT 4 17.270 1.767 22.247 -0.4161

ATOM 69 H52 XT 4 15.321 1.688 22.711 0.0689

ATOM 70 O1 XT 4 19.287 1.675 21.523 -0.6742

ATOM 71 H1O XT 4 20.197 1.942 21.669 0.4537

intermediate

X Y Z RESP-charge

ATOM 1 C1 TR 1 16.031 17.696 27.545 0.5661

ATOM 2 H1 TR 1 16.346 17.783 26.517 0.1381

ATOM 3 C2 TR 1 15.412 16.421 28.025 0.2380

ATOM 4 H2 TR 1 16.199 15.672 27.932 0.0793

ATOM 5 O2 TR 1 14.338 16.131 27.159 -0.6930

ATOM 6 H2O TR 1 13.971 15.278 27.403 0.4982

ATOM 7 C3 TR 1 14.937 16.516 29.472 0.1753

ATOM 8 H3 TR 1 13.947 16.971 29.507 0.0862

ATOM 9 O3 TR 1 14.905 15.219 30.022 -0.6507

ATOM 10 H3O TR 1 14.590 15.279 30.927 0.4745

ATOM 11 C4 TR 1 15.924 17.379 30.253 0.0705

ATOM 12 H4 TR 1 16.924 16.948 30.206 0.1048

ATOM 13 O4 TR 1 15.752 17.465 31.686 -0.3357

ATOM 14 C5 TR 1 15.917 18.769 29.623 0.0352

ATOM 15 H51 TR 1 14.915 19.188 29.716 0.1657

ATOM 16 OR TR 1 16.251 18.675 28.257 -0.3186

ATOM 17 H52 TR 1 16.629 19.417 30.135 0.1657

ATOM 18 C1 XB 2 16.676 16.889 32.692 0.2374

ATOM 19 H1 XB 2 17.727 17.181 32.764 0.1046

ATOM 20 C2 XB 2 16.005 17.621 33.901 0.0327

ATOM 21 H2 XB 2 14.945 17.415 34.020 0.1228

ATOM 22 O2 XB 2 16.307 18.984 33.799 -0.6277

ATOM 23 H2O XB 2 15.959 19.334 32.989 0.4301

ATOM 24 C3 XB 2 16.656 17.042 35.182 0.1026

ATOM 25 H3 XB 2 17.729 17.225 35.160 0.1054

ATOM 26 O3 XB 2 16.080 17.613 36.324 -0.6741

ATOM 27 H3O XB 2 16.171 18.556 36.268 0.4657

ATOM 28 C4 XB 2 16.435 15.513 35.228 0.1597

ATOM 29 H4 XB 2 15.370 15.292 35.277 0.1067

ATOM 30 O4 XB 2 17.109 14.965 36.322 -0.6752

ATOM 31 H4O XB 2 16.843 15.418 37.111 0.4559

ATOM 32 C5 XB 2 16.997 14.876 33.935 0.0216

ATOM 33 H51 XB 2 18.080 14.979 33.919 0.0971

ATOM 34 OR XB 2 16.421 15.477 32.802 -0.3622

ATOM 35 H52 XB 2 16.755 13.824 33.893 0.0971

TER

ATOM 36 C1 XT 3 16.431 16.682 15.429 0.3609

ATOM 37 H1 XT 3 15.412 17.074 15.381 0.0394

ATOM 38 C2 XT 3 16.274 15.349 16.202 0.0883

ATOM 39 H2 XT 3 17.257 14.910 16.352 0.1082

ATOM 40 O2 XT 3 15.376 14.506 15.537 -0.6980

ATOM 41 H2O XT 3 15.701 14.306 14.669 0.4751

ATOM 42 C3 XT 3 15.756 15.630 17.635 0.1647

ATOM 43 H3 XT 3 14.755 16.055 17.580 0.1040

ATOM 44 O3 XT 3 15.753 14.449 18.390 -0.6688

ATOM 45 H3O XT 3 15.227 13.803 17.936 0.4586

ATOM 46 C4 XT 3 16.674 16.662 18.333 0.0519

ATOM 47 H4 XT 3 17.666 16.236 18.472 0.1435

ATOM 48 O4 XT 3 16.116 17.037 19.557 -0.3975

ATOM 49 C5 XT 3 16.815 17.924 17.450 0.0219

ATOM 50 H51 XT 3 15.858 18.438 17.391 0.0851

ATOM 51 OR XT 3 17.274 17.576 16.167 -0.4161

ATOM 52 H52 XT 3 17.536 18.611 17.868 0.0851

ATOM 53 O1 XT 3 16.980 16.441 14.053 -0.6368

ATOM 54 H1O XT 3 17.033 17.309 13.558 0.4911

ATOM 55 C1 XR 4 16.443 17.237 20.720 0.1765

ATOM 56 H1 XR 4 17.513 17.422 20.850 0.1046

ATOM 57 C2 XR 4 15.779 18.531 21.256 0.0327

ATOM 58 H2 XR 4 14.699 18.413 21.220 0.1228

ATOM 59 O2 XR 4 16.249 19.643 20.546 -0.6277

ATOM 60 H2O XR 4 16.030 19.557 19.628 0.4301

ATOM 61 C3 XR 4 16.096 18.707 22.761 0.1026

ATOM 62 H3 XR 4 17.167 18.855 22.891 0.1054

ATOM 63 O3 XR 4 15.379 19.789 23.288 -0.6741

ATOM 64 H3O XR 4 15.589 20.564 22.782 0.4657

ATOM 65 C4 XR 4 15.695 17.426 23.530 0.1597

ATOM 66 H4 XR 4 14.623 17.262 23.449 0.1067

ATOM 67 O4 XR 4 16.086 17.528 24.868 -0.6752

ATOM 68 H4O XR 4 15.732 18.326 25.236 0.4559

ATOM 69 C5 XR 4 16.414 16.208 22.899 0.0216

ATOM 70 H51 XR 4 17.485 16.288 23.071 0.0971

ATOM 71 OR XR 4 16.133 16.132 21.524 -0.3622

ATOM 72 H52 XR 4 16.126 15.263 23.335 0.0971
